# Supplementary material
Source: PubMed Central journal article supplement (PMC4681450)
Supplement: NIHMS682058-supplement-Appendices.pdf [file NIHMS682058-supplement-Appendices.pdf]

Online Appendix 1

Oligonucleotide sequences for primers of 16 microsatellite loci scored in this study. Of these, 13 loci were polymorphic in the Colorado populations and 10 were polymorphic in the Idaho populations.

| Marker name      | Forward Primer                             | Reverse Primer             | Polymorphic in Colorado populations? | Polymorphic in Idaho populations? |
|------------------|--------------------------------------------|----------------------------|--------------------------------------|-----------------------------------|
| <b>BF-11</b>     | TCCTCCATTGTAGAGCAGAGC                      | CCATTGCTTAAACCCTAAACC      | yes                                  | yes                               |
| <b>BF-20</b>     | TTCTCGGAAAGTAATGAGGAG                      | GCAAATCTGACCAATGCAAG       | yes                                  | yes                               |
| <b>BF-3</b>      | TTTTTAGACAGTAGTGGCTGTGAG                   | ACTTCGTTCCAGGCTCGTC        | yes                                  | yes                               |
| <b>ca72</b>      | CACGACGTTGTAACGACAATCCAGTAACCAAACACACA     | CCCAGTCTAACCACGACCAC       | yes                                  | yes                               |
| <b>BF-19</b>     | CACGACGTTGTAACGACACCGCATTGGTGTGTGTC        | ATAACGGACGCGACCAAAG        | yes                                  | yes                               |
| <b>e9</b>        | CACGACGTTGTAACGACAGGAAAGGACAAAAGACATG      | GCTTCCATGGAAGGAGACCC       | yes                                  | yes                               |
| <b>ICE3</b>      | CACGACGTTGTAACGACGACTAATCATCACCGACTCAGCCAC | ATTCTTCTTCACTTTTCTTGATCCCG | yes                                  | no                                |
| <b>Bdru-878</b>  | CACGACGTTGTAACGACGGAACTTCATGTCCAAAG        | TGCTTTTCCGTTTTTCTAATC      | yes                                  | yes                               |
| <b>ICE14</b>     | CACGACGTTGTAACGACTCGAGGTGCTTTCTGAGGTT      | TACCTCACCTTTTGACCCA        | no                                   | yes                               |
| <b>Bdru-1220</b> | CACGACGTTGTAACGACTCTATGCAAACAGCAAATCG      | TTCTTCTACGAAACATTCTTGC     | yes                                  | yes                               |
| <b>Bdru-266</b>  | CACGACGTTGTAACGACTTTAATTTGTGCGTTTGATCC     | CAAAATCGCAGAATGAGAGG       | yes                                  | yes                               |
| <b>a3</b>        | CAACACATGGATGAGATTTTCG                     | GATCTTGGTTTCCGGTGAG        | no                                   | no                                |
| <b>BF-15</b>     | CAGCATCTCCTTTGGGTTTG                       | ACTTGCTCCTTTGCATGACC       | yes                                  | no                                |
| <b>BF-9</b>      | AAACACATTCCCGTCAGCTC                       | TTGATTGAATCCTGCGTTTG       | yes                                  | no                                |
| <b>c8</b>        | TTCCGGGTATCATTCTAG                         | GTTGTAAGTTCTTTCTCAG        | yes                                  | no                                |
| <b>ICE11</b>     | CACGACGTTGTAACGACTTTCAAGTTGAGAAGTGGAGTG    | AAGAATTAGGCAAGAGTTTAGTGG   | no                                   | no                                |

Thermocycler conditions:

- 1) 94°C for 3 minutes
- 2) 40 cycles of: 94°C for 20 seconds, 50°C for 30 seconds, then 72°C for 30 seconds
- 3) 72°C for 6 minutes
- 4) 4°C hold

Online Appendix 2

Coordinates of accessions genotyped to quantify genetic similarity.

| <b>Accession</b> | <b>Latitude</b> | <b>Longitude</b> | <b>Region</b> |
|------------------|-----------------|------------------|---------------|
| GV1_5            | 38.9812333      | -106.9983333     | Colorado      |
| GV46_8           | 38.98035        | -106.9960333     | Colorado      |
| GV47_5           | 38.9800333      | -106.9996333     | Colorado      |
| GV49_2           | 38.9842         | -107.0038667     | Colorado      |
| GV50_4           | 38.9795         | -107.0005        | Colorado      |
| GV51_1           | 38.9783667      | -107.0012        | Colorado      |
| GV104_6          | 38.9773333      | -106.9946667     | Colorado      |
| GV52_3           | 38.9776333      | -107.0040667     | Colorado      |
| GV54_3           | 38.9732         | -106.9997333     | Colorado      |
| GV66_3           | 38.9796333      | -107.00405       | Colorado      |
| GV55_2           | 38.9945         | -107.0088        | Colorado      |
| GV153_1          | 38.99295        | -107.0130167     | Colorado      |
| GV154_7          | 38.9942333      | -107.0146833     | Colorado      |
| GV156_3          | 38.99665        | -107.01495       | Colorado      |
| GV56_2           | 39.0023833      | -107.00235       | Colorado      |
| GV58_3           | 39.0076667      | -106.99885       | Colorado      |
| GV180_5          | 39.0038333      | -107.0072167     | Colorado      |
| GV181_2          | 39.005          | -107.013         | Colorado      |
| GV182_1          | 39.00495        | -107.0178333     | Colorado      |
| GV183_2          | 39.0063667      | -107.0222        | Colorado      |
| GV184_1          | 39.01055        | -107.0297        | Colorado      |
| GV185_2          | 39.0113833      | -107.03395       | Colorado      |
| GV186_1          | 39.01505        | -107.0352        | Colorado      |
| GV60_3           | 38.9879833      | -107.0120167     | Colorado      |
| GV63_9           | 38.9880833      | -107.0079667     | Colorado      |
| GV151_4          | 38.9891667      | -107.0123        | Colorado      |
| GV152_5          | 38.9901333      | -107.0115833     | Colorado      |
| GV61_2           | 38.9849833      | -107.0095667     | Colorado      |
| GV64_4           | 38.9836167      | -107.0080667     | Colorado      |
| GV68_1           | 38.9609         | -106.9926833     | Colorado      |
| GV69_2           | 38.9630167      | -106.9952        | Colorado      |
| GV70_4           | 38.9636833      | -106.9947667     | Colorado      |
| GV74_1           | 38.94345        | -106.9816333     | Colorado      |
| GV75_2           | 38.9484167      | -106.9773333     | Colorado      |
| GV77_4           | 38.9524667      | -106.9754833     | Colorado      |
| GV78_2           | 38.95255        | -106.9729667     | Colorado      |
| GV80_2           | 38.9545333      | -106.9703667     | Colorado      |

|         |            |              |          |
|---------|------------|--------------|----------|
| GV81_3  | 38.9553167 | -106.9722833 | Colorado |
| GV83_3  | 38.9548    | -106.9787333 | Colorado |
| GV84_2  | 38.9563667 | -106.9798    | Colorado |
| GV86_2  | 38.9554833 | -106.9884667 | Colorado |
| GV88_2  | 38.951     | -106.98965   | Colorado |
| GV89_1  | 38.9498667 | -106.9901333 | Colorado |
| GV90_6  | 38.9507333 | -106.9923333 | Colorado |
| GV91_4  | 38.9535167 | -106.9924167 | Colorado |
| GV92_7  | 38.9541667 | -106.9935333 | Colorado |
| GV94_4  | 38.9618333 | -106.9891667 | Colorado |
| GV95_10 | 38.9621667 | -106.9883333 | Colorado |
| GV97_4  | 38.9655    | -106.9883333 | Colorado |
| GV98_3  | 38.9668333 | -106.9896667 | Colorado |
| GV99_3  | 38.9671667 | -106.9903333 | Colorado |
| GV100_5 | 38.9708333 | -106.9901667 | Colorado |
| GV101_4 | 38.9748333 | -106.9911667 | Colorado |
| GV102_7 | 38.9761667 | -106.9895    | Colorado |
| GV103_2 | 38.9795    | -106.99      | Colorado |
| GV107_3 | 39.0025    | -107.0215    | Colorado |
| GV161_4 | 38.9992667 | -107.0210833 | Colorado |
| GV162_1 | 39.0003667 | -107.0231    | Colorado |
| GV163_3 | 39.0014333 | -107.0238333 | Colorado |
| GV164_2 | 39.0021    | -107.023     | Colorado |
| GV157_4 | 38.9969833 | -107.0168167 | Colorado |
| GV158_1 | 38.9961833 | -107.0186667 | Colorado |
| GV159_4 | 38.9975    | -107.0188333 | Colorado |
| GV160_1 | 38.99795   | -107.0208167 | Colorado |
| GV177_3 | 38.9973667 | -107.0221833 | Colorado |
| GV178_4 | 38.9988    | -107.0246    | Colorado |
| GV165_1 | 39.0031833 | -107.0268167 | Colorado |
| GV167_5 | 39.0044833 | -107.02795   | Colorado |
| GV168_1 | 39.00415   | -107.0292    | Colorado |
| GV169_4 | 39.0054333 | -107.0299333 | Colorado |
| GV170_3 | 39.0054833 | -107.0344833 | Colorado |
| GV171_6 | 39.0120667 | -107.0438333 | Colorado |
| GV172_4 | 39.0138167 | -107.0447667 | Colorado |
| GV174_2 | 39.0141833 | -107.0454167 | Colorado |
| GV175_1 | 39.0140167 | -107.0445833 | Colorado |
| GV176_5 | 39.01185   | -107.04165   | Colorado |
| GV187_2 | 38.9955    | -107.0223333 | Colorado |
| GV188_2 | 38.9944167 | -107.0242667 | Colorado |

|         |            |              |          |
|---------|------------|--------------|----------|
| GV192_1 | 38.9947333 | -107.02265   | Colorado |
| GV189_3 | 38.9941167 | -107.0298833 | Colorado |
| GV190_2 | 38.9917833 | -107.0309167 | Colorado |
| GV191_2 | 38.9929333 | -107.0265167 | Colorado |
| GV194_2 | 38.9906    | -107.0196667 | Colorado |
| GV195_1 | 38.9898333 | -107.0230333 | Colorado |
| GV196_4 | 38.9782    | -106.9750167 | Colorado |
| GV197_4 | 38.9859    | -106.97045   | Colorado |
| GV198_1 | 39.0129167 | -106.94635   | Colorado |
| GV199_2 | 39.0068667 | -106.9452    | Colorado |
| GV200_1 | 38.9981167 | -106.9812    | Colorado |
| GV201_3 | 38.9699167 | -107.0267333 | Colorado |
| GV202_1 | 38.9688167 | -107.0276667 | Colorado |
| GV203_1 | 38.9694333 | -107.0294833 | Colorado |
| GV204_3 | 38.9723833 | -107.0350833 | Colorado |
| GV205_1 | 38.9738833 | -107.03655   | Colorado |
| GV71_2  | 38.9657333 | -106.9950833 | Colorado |
| GV105_2 | 38.9713333 | -106.9961667 | Colorado |
| GV106_7 | 38.9651667 | -106.9934167 | Colorado |
| MV001   | 44.18248   | -113.74462   | Idaho    |
| MV006   | 44.17648   | -113.77137   | Idaho    |
| MV007   | 44.17270   | -113.77018   | Idaho    |
| MV008   | 44.17818   | -113.77217   | Idaho    |
| MV009   | 44.18213   | -113.76773   | Idaho    |
| MV010   | 44.18283   | -113.76680   | Idaho    |
| MV011   | 44.1817167 | -113.7607167 | Idaho    |
| MV012   | 44.18083   | -113.75820   | Idaho    |
| MV014   | 44.18667   | -113.73593   | Idaho    |
| MV015   | 44.19278   | -113.72825   | Idaho    |
| MV016   | 44.18378   | -113.72662   | Idaho    |
| MV017   | 44.20133   | -113.72123   | Idaho    |
| MV018   | 44.20078   | -113.74647   | Idaho    |
| MV019   | 44.19867   | -113.74543   | Idaho    |
| MV020   | 44.19493   | -113.75003   | Idaho    |
| MV021   | 44.19182   | -113.75658   | Idaho    |
| MV022   | 44.18950   | -113.76073   | Idaho    |
| MV023   | 44.18795   | -113.75770   | Idaho    |
| MV024   | 44.19165   | -113.74755   | Idaho    |
| MV073   | 44.18867   | -113.76283   | Idaho    |
| MV074   | 44.18517   | -113.76600   | Idaho    |
| MV076   | 44.18017   | -113.77217   | Idaho    |

|       |            |              |       |
|-------|------------|--------------|-------|
| MV078 | 44.17867   | -113.77617   | Idaho |
| MV079 | 44.18750   | -113.76883   | Idaho |
| MV080 | 44.18583   | -113.77017   | Idaho |
| MV081 | 44.18283   | -113.76950   | Idaho |
| MV082 | 44.18067   | -113.77383   | Idaho |
| MV083 | 44.17933   | -113.78000   | Idaho |
| MV084 | 44.18050   | -113.78583   | Idaho |
| MV085 | 44.17567   | -113.78117   | Idaho |
| MV086 | 44.17367   | -113.77967   | Idaho |
| MV087 | 44.17033   | -113.77883   | Idaho |
| MV088 | 44.1658333 | -113.7808333 | Idaho |
| MV089 | 44.163     | -113.7778333 | Idaho |
| MV090 | 44.16767   | -113.77567   | Idaho |
| MV091 | 44.17117   | -113.77500   | Idaho |
| MV092 | 44.17467   | -113.77550   | Idaho |
| MV093 | 44.17700   | -113.77450   | Idaho |
| MV094 | 44.17983   | -113.77517   | Idaho |
| MV095 | 44.18367   | -113.77333   | Idaho |
| MV096 | 44.18833   | -113.76067   | Idaho |
| MV097 | 44.18667   | -113.75950   | Idaho |
| MV099 | 44.18600   | -113.75800   | Idaho |
| MV100 | 44.18667   | -113.75683   | Idaho |
| MV102 | 44.18767   | -113.75333   | Idaho |
| MV105 | 44.18933   | -113.75633   | Idaho |
| MV106 | 44.18917   | -113.75900   | Idaho |
| MV125 | 44.18957   | -113.76357   | Idaho |
| MV126 | 44.19098   | -113.73765   | Idaho |
| MV127 | 44.19170   | -113.75370   | Idaho |
| MV128 | 44.19137   | -113.75410   | Idaho |
| MV129 | 44.18602   | -113.76412   | Idaho |
| MV130 | 44.18520   | -113.76428   | Idaho |
| MV131 | 44.19032   | -113.76012   | Idaho |
| MV132 | 44.18735   | -113.76433   | Idaho |
| MV133 | 44.18855   | -113.76573   | Idaho |
| MV134 | 44.18790   | -113.76570   | Idaho |
| MV135 | 44.19090   | -113.75585   | Idaho |
| MV137 | 44.18488   | -113.76557   | Idaho |
| MV139 | 44.18445   | -113.76625   | Idaho |
| MV140 | 44.18955   | -113.74343   | Idaho |
| MV141 | 44.19027   | -113.74197   | Idaho |
| MV142 | 44.19122   | -113.75490   | Idaho |

|        |            |              |       |
|--------|------------|--------------|-------|
| MV143  | 44.18547   | -113.76343   | Idaho |
| MV144  | 44.19035   | -113.74072   | Idaho |
| MV145  | 44.18813   | -113.76403   | Idaho |
| MV151  | 44.18373   | -113.76770   | Idaho |
| MV152  | 44.18317   | -113.76830   | Idaho |
| MV156  | 44.17973   | -113.76505   | Idaho |
| MV157  | 44.18052   | -113.76392   | Idaho |
| MV158  | 44.17977   | -113.76683   | Idaho |
| MV159  | 44.18080   | -113.76233   | Idaho |
| MV160  | 44.18327   | -113.75730   | Idaho |
| MV161  | 44.1832667 | -113.7573    | Idaho |
| MV162  | 44.18423   | -113.76732   | Idaho |
| MV163  | 44.18350   | -113.75605   | Idaho |
| MV167  | 44.18247   | -113.75857   | Idaho |
| MV168  | 44.18075   | -113.7625333 | Idaho |
| MV170  | 44.18760   | -113.74370   | Idaho |
| MV172  | 44.18302   | -113.75827   | Idaho |
| MV174  | 44.1844333 | -113.7549167 | Idaho |
| MV179  | 44.18135   | -113.76135   | Idaho |
| MV180  | 44.18953   | -113.73708   | Idaho |
| MV183  | 44.18663   | -113.74890   | Idaho |
| MV138  | 44.19087   | -113.73635   | Idaho |
| MV147  | 44.19062   | -113.73953   | Idaho |
| MV150A | 44.1884167 | -113.74665   | Idaho |
| MV150B | 44.1884167 | -113.74665   | Idaho |
| MV154  | 44.18155   | -113.76868   | Idaho |
| MV165A | 44.1819667 | -113.7604333 | Idaho |
| MV165B | 44.1819667 | -113.7604333 | Idaho |
| MV173A | 44.1866    | -113.7457667 | Idaho |
| MV173B | 44.1866    | -113.7457667 | Idaho |
| MV177A | 44.1808    | -113.76895   | Idaho |
| MV177B | 44.1808    | -113.76895   | Idaho |
| MV178A | 44.1844333 | -113.7549167 | Idaho |
| MV178B | 44.1844333 | -113.7549167 | Idaho |
| MV181A | 44.1802667 | -113.7661333 | Idaho |
| MV181B | 44.1802667 | -113.7661333 | Idaho |
| MV184A | 44.1865667 | -113.7495167 | Idaho |
| MV184B | 44.1865667 | -113.7495167 | Idaho |
| MV050A | 44.19465   | -113.74127   | Idaho |
| MV050B | 44.18253   | -113.74615   | Idaho |
| MV051A | 44.18710   | -113.74450   | Idaho |

|        |          |            |       |
|--------|----------|------------|-------|
| MV051B | 44.18233 | -113.75002 | Idaho |
| MV052A | 44.18780 | -113.74290 | Idaho |
| MV052B | 44.18177 | -113.75175 | Idaho |
| MV054A | 44.18890 | -113.73900 | Idaho |
| MV055A | 44.18980 | -113.73660 | Idaho |
| MV055B | 44.17990 | -113.75883 | Idaho |
| MV056B | 44.17922 | -113.76428 | Idaho |
| MV058B | 44.18292 | -113.75065 | Idaho |
| MV059A | 44.19370 | -113.72790 | Idaho |
| MV062A | 44.18810 | -113.73340 | Idaho |
| MV063A | 44.18720 | -113.73460 | Idaho |
| MV066C | 44.19510 | -113.74283 | Idaho |
| MV067A | 44.19270 | -113.74560 | Idaho |
| MV067B | 44.19322 | -113.74723 | Idaho |
| MV067C | 44.19300 | -113.74533 | Idaho |
| MV067F | 44.19283 | -113.74333 | Idaho |
| MV070C | 44.19570 | -113.74490 | Idaho |
| MV071A | 44.19545 | -113.74923 | Idaho |
| MV071B | 44.19515 | -113.74840 | Idaho |
| MV071C | 44.19478 | -113.74950 | Idaho |
| MV072A | 44.19633 | -113.74983 | Idaho |
| MV072B | 44.19867 | -113.75133 | Idaho |
| MV072C | 44.19950 | -113.75383 | Idaho |
| MV072D | 44.19720 | -113.75680 | Idaho |

Online Appendix 3

Coordinates for gardens and maternal families in the Colorado and Idaho common garden experiments. We transplanted full siblings of one family per population.

| <b>Region</b> | <b>Family</b>         | <b>Latitude</b> | <b>Longitude</b> | <b>Elevation (m)</b> | <b>Geographic distance from low elevation CO garden (m)</b> | <b>Geographic distance from high elevation CO garden (m)</b> | <b>Geographic distance from Idaho garden (m)</b> | <b>2011 cohort</b>      | <b>2012 cohort</b> |
|---------------|-----------------------|-----------------|------------------|----------------------|-------------------------------------------------------------|--------------------------------------------------------------|--------------------------------------------------|-------------------------|--------------------|
| CO            | low elevation garden  | 38°57.086       | -106°59.465      | 2891                 | 0                                                           |                                                              |                                                  |                         |                    |
| CO            | high elevation garden | 39°02.346       | -107°03.818      | 3133                 |                                                             | 0                                                            |                                                  |                         |                    |
| CO            | GV048                 | 38° 58.929      | -107°00.078      | 2949                 | 3512.3                                                      | 8277.9                                                       | NA                                               | CO low elevation garden | both CO gardens    |
| CO            | GV049                 | 38° 59.052      | -107°00.232      | 2940                 | 3790.5                                                      | 7962.0                                                       | NA                                               | CO low elevation garden | both CO gardens    |
| CO            | GV050                 | 38° 58.770      | -107°00.030      | 2934                 | 3210.0                                                      | 8548.2                                                       | NA                                               | CO low elevation garden | both CO gardens    |
| CO            | GV066                 | 38° 58.778      | -107°00.243      | 2929                 | 3312.6                                                      | 8347.3                                                       | NA                                               | CO low elevation garden | both CO gardens    |
| CO            | GV068                 | 38° 57.654      | -106°59.561      | 2910                 | 1050.4                                                      | 10601.8                                                      | NA                                               | CO low elevation garden | both CO gardens    |
| CO            | GV072                 | 38° 58.070      | -106°59.799      | 2933                 | 1872.3                                                      | 9777.1                                                       | NA                                               | CO low elevation garden | both CO gardens    |
| CO            | GV086                 | 38° 57.329      | -106°59.308      | 2880                 | 499.1                                                       | 11302.2                                                      | NA                                               | CO low elevation garden | both CO gardens    |
| CO            | GV089                 | 38° 56.992      | -106°59.408      | 2869                 | 204.9                                                       | 11743.3                                                      | NA                                               | CO low elevation garden | both CO gardens    |
| CO            | GV092                 | 38° 57.250      | -106°59.612      | 2925                 | 355.9                                                       | 11183.7                                                      | NA                                               | CO low elevation garden | both CO gardens    |
| CO            | GV095                 | 38° 57.730      | -106°59.300      | 2966                 | 1208.6                                                      | 10707.2                                                      | NA                                               | CO low elevation garden | both CO gardens    |



|    |              |             |             |        |    |        |         |    |                         |                              |
|----|--------------|-------------|-------------|--------|----|--------|---------|----|-------------------------|------------------------------|
| CO | GV096        | 38° 57.750  | -106°59.140 | 2994   |    | 1309.3 | 10817.2 | NA | CO low elevation garden | both CO gardens              |
| CO | GV101        | 38° 58.490  | -106°59.470 | 3050   |    | 2590.9 | 9460.3  | NA | CO low elevation garden | both CO gardens              |
| CO | GV105        | 38° 58.280  | -106°59.770 | 2929   |    | 2242.8 | 9490.2  | NA | CO low elevation garden | both CO gardens              |
| CO | GV161        | 38° 59.956  | -107°01.265 | 3055   |    | 5891.4 | 5731.5  | NA | CO low elevation garden | both CO gardens              |
| CO | GV175        | 39 00.841   | -107°02.675 | 3251   |    | 8315.9 | 3226.8  | NA | CO low elevation garden | both CO gardens              |
| CO | GV185        | 39 00.683   | -107°02.037 | 3411   |    | 7594.1 | 3991.4  | NA | CO low elevation garden | both CO gardens              |
| CO | GV187        | 38° 59.730  | -107°01.340 | 3067   |    | 5568.0 | 5996.5  | NA | CO low elevation garden | both CO gardens              |
| CO | GV188        | 38° 59.665  | -107°01.456 | 3126   |    | 5545.4 | 5999.4  | NA | CO low elevation garden | both CO gardens              |
| CO | GV194        | 38° 59.436  | -107°01.180 | 3108   |    | 4981.0 | 6572.3  | NA | CO low elevation garden | both CO gardens              |
| CO | GV197        | 38° 59.154  | -106°58.227 | 3682   |    | 4214.1 | 9932.1  | NA | CO low elevation garden | both CO gardens              |
| CO | GV198        | 39 00.775   | -106°56.781 | 3623   |    | 7830.5 | 10460.5 | NA | CO low elevation garden | both CO gardens              |
| CO | GV200        | 38° 59.887  | -106°58.872 | 3448   |    | 5248.6 | 8401.8  | NA | CO low elevation garden | both CO gardens              |
| CO | GV202        | 38° 58.129  | -107°01.660 | 3368   |    | 3668.5 | 8392.4  | NA | CO low elevation garden | both CO gardens              |
| CO | GV205        | 38° 58.433  | -107°02.193 | 3463   |    | 4612.5 | 7605.8  | NA | CO low elevation garden | both CO gardens              |
| ID | Idaho garden | 44°10.906'' | -113°44.363 | 2535   |    |        |         |    | 0                       |                              |
| ID | MV050B       | 44° 10.952  | -113°44.769 | 2545.1 | NA |        | NA      |    | 550                     | Idaho garden<br>Idaho garden |

|    |        |            |             |        |    |    |       |              |              |
|----|--------|------------|-------------|--------|----|----|-------|--------------|--------------|
| ID | MV051A | 44° 11.226 | -113°44.67  | 2430.8 | NA | NA | 717   | Idaho garden | Idaho garden |
| ID | MV051B | 44° 10.94  | -113°45.001 | 2496.3 | NA | NA | 857   | Idaho garden | Idaho garden |
| ID | MV052B | 44° 10.906 | -113°45.105 | 2499.4 | NA | NA | 994   | Idaho garden | Idaho garden |
| ID | MV054A | 44° 11.334 | -113° 44.34 | 2423.2 | NA | NA | 787   | Idaho garden | Not planted  |
| ID | MV055A | 44° 11.388 | -113°44.196 | 2414   | NA | NA | 913   | Idaho garden | Idaho garden |
| ID | MV055B | 44° 10.794 | -113°45.53  | 2529.8 | NA | NA | 1576  | Idaho garden | Idaho garden |
| ID | MV058B | 44° 10.975 | -113°45.039 | 2487.2 | NA | NA | 914   | Idaho garden | Idaho garden |
| ID | MV062A | 44° 11.286 | -113°44.004 | 2441.4 | NA | NA | 848   | Idaho garden | Idaho garden |
| ID | MV063A | 44° 11.232 | -113°44.076 | 2465.8 | NA | NA | 712   | Idaho garden | Idaho garden |
| ID | MV066A | 44° 11.628 | -113°44.581 | 2468.9 | NA | NA | 1358  | Idaho garden | Not planted  |
| ID | MV067A | 44° 11.562 | -113°44.736 | 2478.0 | NA | NA | 1304  | Idaho garden | Idaho garden |
| ID | MV067B | 44° 11.593 | -113°44.834 | 2487.2 | NA | NA | 1411  | Idaho garden | Idaho garden |
| ID | MV067F | 44° 11.57  | -113° 44.6  | 2466.1 | NA | NA | 1260  | Idaho garden | Idaho garden |
| ID | MV70C  | 44° 11.742 | -113°44.694 | 2479   | NA | NA | 1,598 | Not planted  | Idaho garden |
| ID | MV071C | 44° 11.687 | -113°44.97  | 2505.5 | NA | NA | 1649  | Idaho garden | Idaho garden |
| ID | MV072A | 44° 11.78  | -113°44.99  | 2510   | NA | NA | 1812  | Idaho garden | Idaho garden |
| ID | MV072C | 44° 11.97  | -113°45.23  | 2648.7 | NA | NA | 2273  | Idaho garden | Idaho garden |

|    |       |           |            |        |    |    |       |              |              |
|----|-------|-----------|------------|--------|----|----|-------|--------------|--------------|
| ID | MV073 | 44° 11.32 | -113°45.77 | 2598.4 | NA | NA | 2032  | Idaho garden | Idaho garden |
| ID | MV080 | 44° 11.15 | -113°46.21 | 2513   | NA | NA | 2,513 | Not planted  | Idaho garden |
| ID | MV085 | 44° 10.54 | -113°46.87 | 2746   | NA | NA | 3,424 | Not planted  | Idaho garden |
| ID | MV090 | 44° 10.06 | -113°46.54 | 2884.9 | NA | NA | 3303  | Idaho garden | Idaho garden |
| ID | MV092 | 44° 10.48 | -113°46.53 | 2723.4 | NA | NA | 3005  | Idaho garden | Idaho garden |
| ID | MV094 | 44° 10.79 | -113°46.51 | 2686.8 | NA | NA | 2883  | Idaho garden | Idaho garden |
| ID | MV095 | 44° 11.02 | -113°46.4  | 2726.4 | NA | NA | 2736  | Idaho garden | Idaho garden |
| ID | MV100 | 44° 11.2  | -113°45.41 | 2540.5 | NA | NA | 1502  | Idaho garden | Idaho garden |

Online Appendix 4

Lifetime fitness components (survival and fecundity) analyzed separately for each garden and cohort.

Table 4A: Length of study for the separate cohorts and sites. The cohort indicates the year of planting. All individuals from that cohort were transplanted as juvenile rosettes of 2-3 months old in September-October of that year, and monitored in subsequent growing seasons.

|                                                        | Monitored<br>in 2012? | <b>Monitored<br/>in 2013?</b> | <b>Monitored<br/>in 2014?</b> | <b>Total number<br/>of years of<br/>study</b> |
|--------------------------------------------------------|-----------------------|-------------------------------|-------------------------------|-----------------------------------------------|
| Colorado 2011 cohort: Low<br>elevation garden (2891m)  | Yes                   | Yes                           | Yes                           | 3                                             |
| Colorado 2012 cohort: Low<br>elevation garden (2891m)  | No                    | Yes                           | Yes                           | 2                                             |
| Colorado 2012 cohort: High<br>elevation garden (3133m) | No                    | Yes                           | Yes                           | 2                                             |
| Idaho 2011 cohort                                      | Yes                   | Yes                           | No                            | 2                                             |
| Idaho 2012 cohort                                      | No                    | Yes                           | No                            | 1                                             |

**Table 4B:** Variation in foliar damage and fitness in the two cohorts planted into the Colorado low elevation garden. Family level lifetime fitness averages were estimated as LSMEANs from mixed model analyses (Proc Mixed, SAS, ver. 9.3) that included initial size at planting as a covariate. Plants that failed to produce fruits over the course of the experiment were given fitness values of 0. Family means excluded plants that died during the first winter for the Colorado 2011 cohort. We report raw p-values, but highlight in bold the p-values that are significant after controlling for the false discovery rate across multiple analyses (Garcia 2004).

|                                 | Foliar damage                       |                   |                                     |              |                                     |         | Survival       |               |                |                   | Lifetime fitness  |               |                   |         |
|---------------------------------|-------------------------------------|-------------------|-------------------------------------|--------------|-------------------------------------|---------|----------------|---------------|----------------|-------------------|-------------------|---------------|-------------------|---------|
|                                 | CO 2011 cohort: 2012 growing season |                   | CO 2011 cohort: 2013 growing season |              | CO 2012 cohort: 2013 growing season |         | CO 2011 cohort |               | CO 2012 cohort |                   | CO 2011 cohort    |               | CO 2012 cohort    |         |
|                                 | F <sub>1,21</sub>                   | p-value           | F <sub>1,21</sub>                   | P-value      | F <sub>1,21</sub>                   | P-value | $\chi^2$       | p-value       | $\chi^2$       | p-value           | F <sub>1,19</sub> | p-value       | F <sub>1,21</sub> | p-value |
| Source elevation                | 27.9                                | <b>&lt;0.0001</b> | 10.5                                | <b>0.004</b> | 0.26                                | 0.61    | 13.22          | <b>0.0003</b> | 25.3           | <b>&lt;0.0001</b> | 8.31              | <b>0.0095</b> | 0                 | 0.98    |
| Geographic distance             | 0.36                                | 0.56              | 0.6                                 | 0.45         | 1.19                                | 0.29    | 0.019          | 0.89          | 18.2           | <b>&lt;0.0001</b> | 3.57              | 0.074         | 0.02              | 0.9     |
| (Source elevation) <sup>2</sup> |                                     |                   |                                     |              |                                     |         |                |               | 23.9           | <b>&lt;0.0001</b> | 8.24              | <b>0.0098</b> |                   |         |
| (Distance) <sup>2</sup>         |                                     |                   |                                     |              |                                     |         |                |               |                |                   | 4.4               | 0.0496        |                   |         |

Table 4C: Clinal variation in herbivore susceptibility and fitness components in the high elevation CO garden. Family means excluded plants that died because of gopher activity for the CO 2012 high elevation garden. We report raw p-values; we highlight in bold the p-values that are significant after controlling for the false discovery rate across multiple analyses

|                     | Foliar damage     |               | Survival |         | Lifetime fitness  |         |
|---------------------|-------------------|---------------|----------|---------|-------------------|---------|
|                     | F <sub>1,21</sub> | p-value       | $\chi^2$ | p-value | F <sub>1,21</sub> | p-value |
| Source elevation    | 16.99             | <b>0.0005</b> | 0.77     | 0.38    | 1.84              | 0.19    |
| Geographic distance | 5.31              | 0.0315        | 3.12     | 0.077   | 0.94              | 0.34    |

//

Table 4D: Clinal variation in the two cohorts planted into the Idaho garden. The 2012 Idaho cohort had minimal reproductive success: plants from only 8 families successfully flowered, precluding separate analysis of fecundity.

|                     | Foliar damage                       |         |                                     |         |                                     |         | Survival       |         |                |               | Lifetime fitness  |         | Fitness in first growing season (2012) |              |
|---------------------|-------------------------------------|---------|-------------------------------------|---------|-------------------------------------|---------|----------------|---------|----------------|---------------|-------------------|---------|----------------------------------------|--------------|
|                     | ID 2011 cohort: 2012 growing season |         | ID 2011 cohort: 2013 growing season |         | ID 2012 cohort: 2013 growing season |         | ID 2011 cohort |         | ID 2012 cohort |               | ID 2011 cohort    |         | ID 2011 cohort                         |              |
|                     | F <sub>1,20</sub>                   | p-value | F <sub>1,20</sub>                   | p-value | F <sub>1,21</sub>                   | p-value | $\chi^2$       | p-value | $\chi^2$       | p-value       | F <sub>1,20</sub> | p-value | F <sub>1,20</sub>                      | p-value      |
| Source elevation    | 0.96                                | 0.34    | 0                                   | 0.99    | 1.61                                | 0.22    | 0.006          | 0.94    | 6.14           | <b>0.013</b>  | 4.02              | 0.059   | 6.96                                   | <b>0.016</b> |
| Geographic distance | 1.44                                | 0.24    | 0.02                                | 0.89    | 0.72                                | 0.41    | 0.81           | 0.37    | 6.66           | <b>0.0099</b> | 3.8               | 0.065   | 7.59                                   | <b>0.012</b> |

### Online appendix 5

Repeated measures analysis of fitness components in the three years of the study of the low elevation Colorado garden (2012, 2013, and 2014). Results indicate that fitness clines with elevation hold across years (no significant effect of year or year by elevation interaction). Furthermore, these patterns are similar to those reported for fitness components in the main text (Fig. 2), suggesting that survival and fecundity estimates from any of these years would have generated similar results as those presented for lifetime fitness (integrated across years). The quadratic effect of elevation is only apparent for the fitness fecundity component. Here, survival is calculated as the number of individuals of each genotype that survived the growing season over the number that were alive the previous fall (for growing season 2013 and 2014) or the number that overwintered (for growing season 2012). As described in the text, plants on the northern side of this garden experienced high mortality due to unusually high winter runoff in spring 2012; individuals that died between planting and first monitoring on June 1, 2012 were excluded from fitness analysis in the main text. Including those individuals does not fundamentally alter fitness clines, but introduces noise to the data (Online Appendix 6).

The elevation of this garden is 2891m.

Table 5A: Lifetime fitness results for this low elevation garden (replicated from Appendix 4B):

|                                 | Survival |               | Lifetime fitness  |               |
|---------------------------------|----------|---------------|-------------------|---------------|
|                                 | $\chi^2$ | p-value       | F <sub>1,19</sub> | p-value       |
| Source elevation                | 13.22    | <b>0.0003</b> | 8.31              | <b>0.0095</b> |
| Geographic distance             | 0.019    | 0.89          | 3.57              | 0.074         |
| (Source elevation) <sup>2</sup> |          |               | 8.24              | <b>0.0098</b> |
| (Distance) <sup>2</sup>         |          |               | 4.4               | 0.0496        |



Table 5B: Results of repeated measures analyses of annual fitness over the course of three growing seasons (2012, 2013, and 2014). We found no evidence for nonlinear fitness functions for the probability of survival, so we excluded quadratic effects of source elevation and distance. For fecundity, we retained those quadratic effects because the slope of the non-linear relationship between number of fruits and elevation, and for symmetry with the lifetime analyses replicated above. An alternative model excluding quadratic effects of distance for fecundity results in qualitatively similar patterns (not shown).

|                                           | Probability of survival |              | Fecundity               |               |
|-------------------------------------------|-------------------------|--------------|-------------------------|---------------|
|                                           | F <sub>1,21</sub>       | p-value      | F <sub>1,19</sub>       | p-value       |
| Source elevation                          | 8.28                    | <b>0.009</b> | 5.43                    | <b>0.031</b>  |
| (Source elevation) <sup>2</sup>           |                         |              | 8.97                    | <b>0.0074</b> |
| Year                                      | F <sub>2,42</sub> =1.29 | 0.29         | F <sub>2,35</sub> =2.52 | 0.095         |
| Year × Source elevation                   | F <sub>2,42</sub> =0.98 | 0.39         | F <sub>2,35</sub> =2.41 | 0.10          |
| Year × (Source elevation) <sup>2</sup>    |                         |              | F <sub>2,35</sub> =2.41 | 0.10          |
| Geographic distance                       | 0.00                    | 0.99         | 0.24                    | 0.63          |
| (Geographic distance) <sup>2</sup>        |                         |              | 0.01                    | 0.92          |
| Year × Geographic distance                | F <sub>2,42</sub> =0.13 | 0.88         | F <sub>2,35</sub> =0.32 | 0.73          |
| Year × (Geographic distance) <sup>2</sup> |                         |              | F <sub>2,35</sub> =0.39 | 0.68          |

Survival clines from the three separate years:

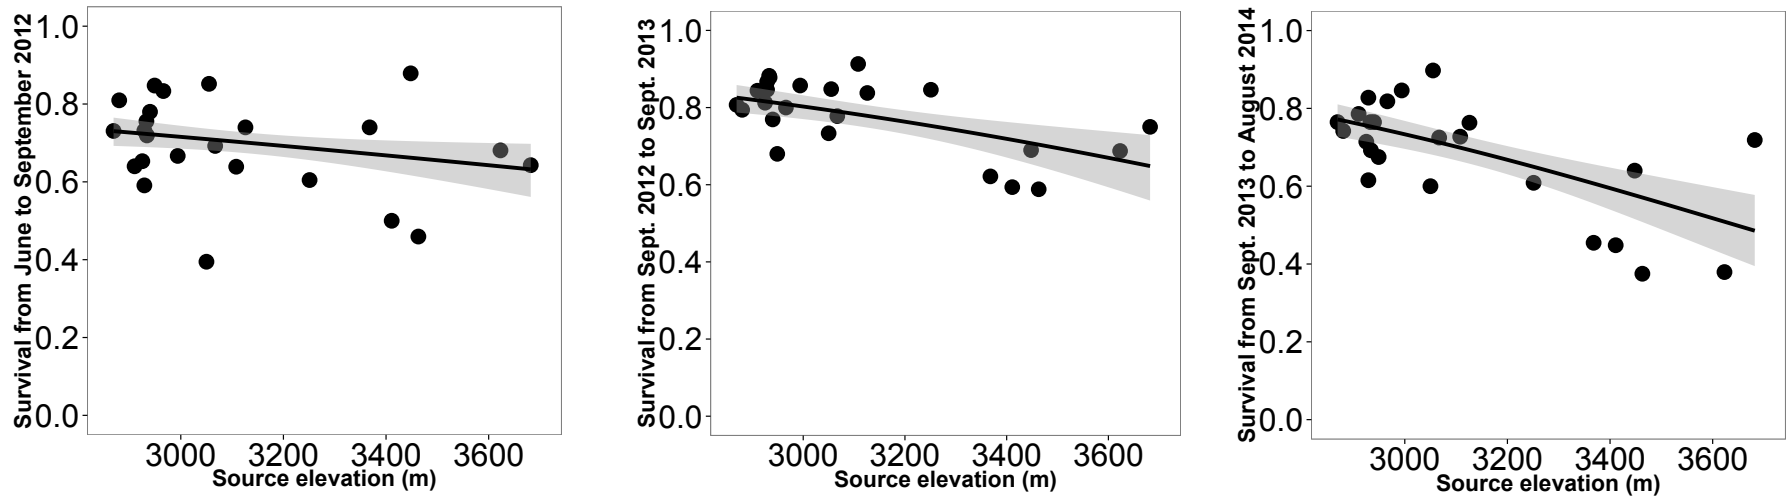

As a point of comparison, below are the survival curves from across the entire experiment (excluding initial overwinter mortality on the left, and including all plants on the right). Both of these clines are statistically significant (see main text and Appendix 6):

Excluding plants that died over the first winter (2011-2012)

Including all individuals, even first-year overwinter mortality

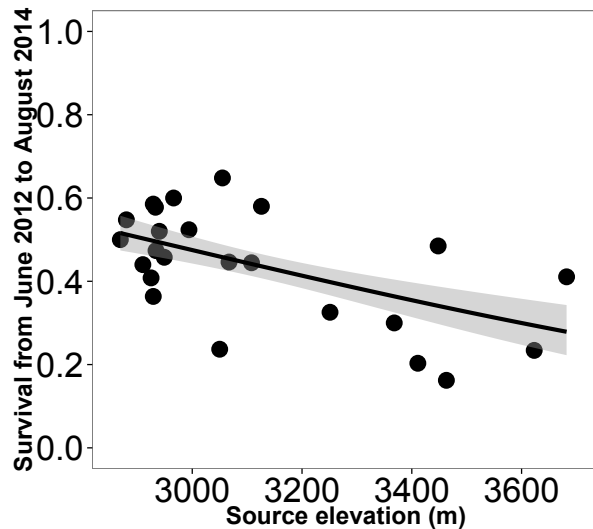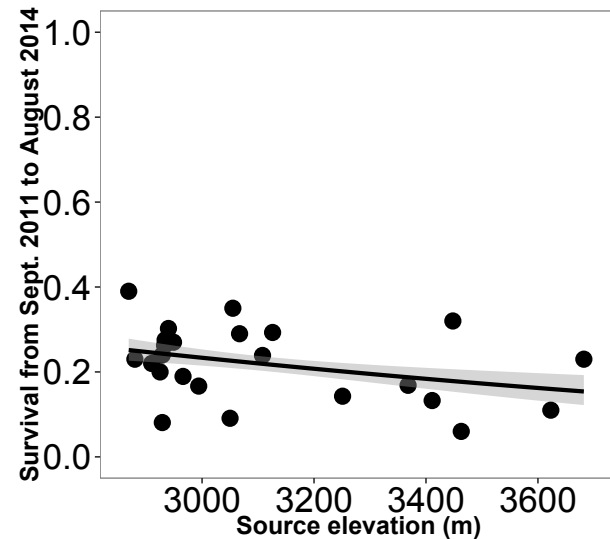

Fecundity clines: Repeated measures ANOVA indicates that there are significant linear and quadratic effects of source elevation, but no significant effect of geographic distance on fecundity. In addition, repeated measures ANOVA found no significant effect of year or year by elevation interactions. In the second year (2013), the non-linear aspect of the clinal relationship is driven by one high elevation family with very high fecundity. For that year, we show an inset plot of the relationship between fecundity and source elevation excluding that outlier. The inset plot does not obscure any data points.

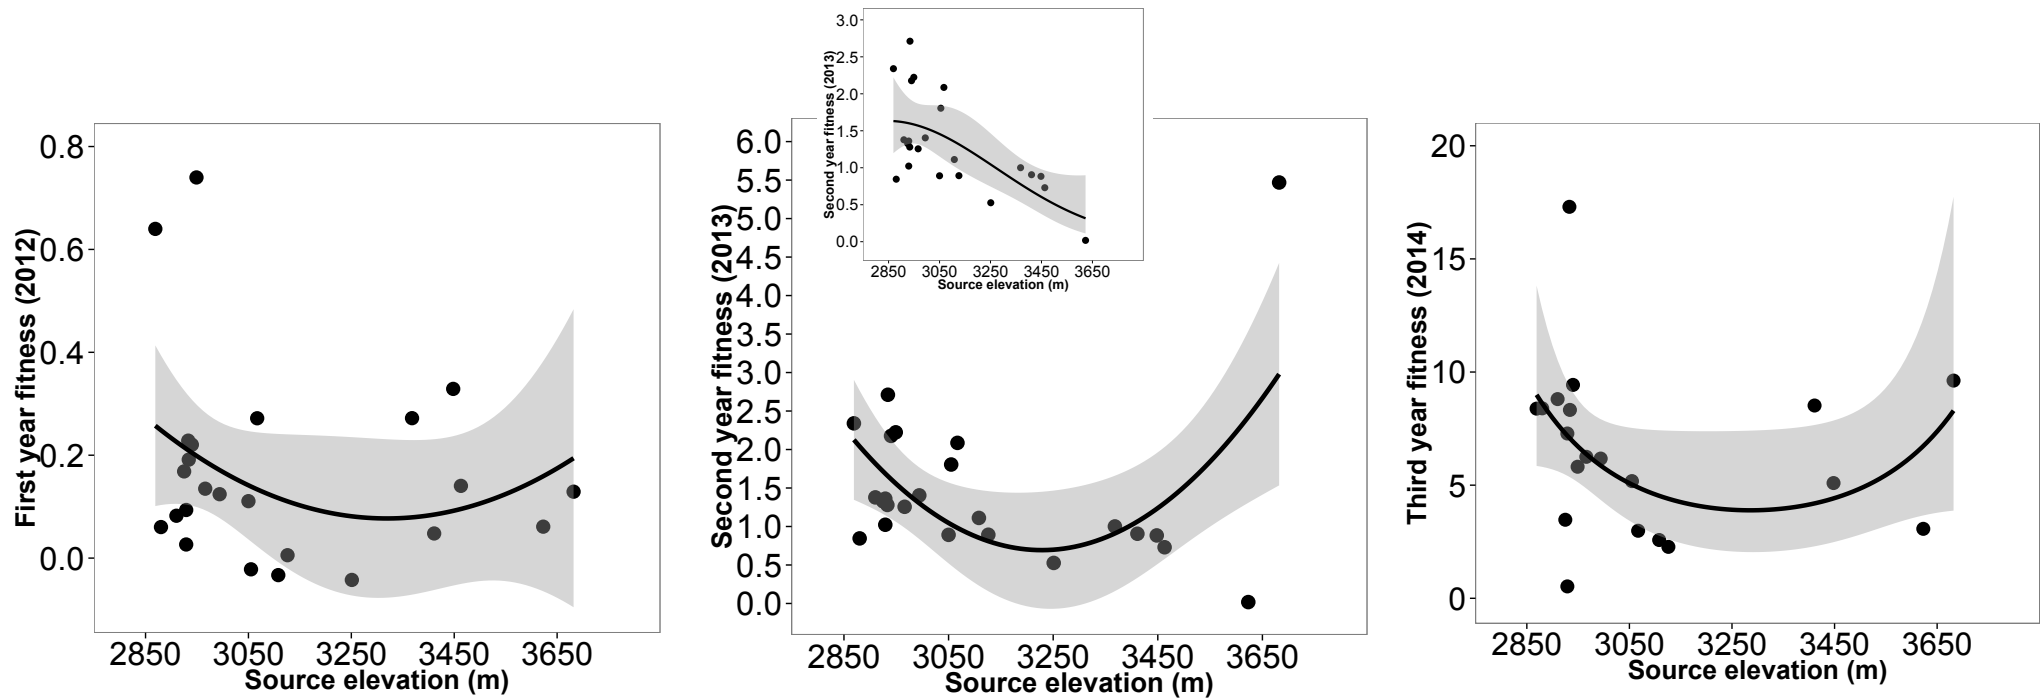

As a point of comparison, below we have replicated the fecundity clines from across all three years. As for survival, we show both the cline with family averages excluding the plants that died over the first winter (Fig 3 in text) and the cline of family averages including all plants (Appendix 6). In both cases, we find significant linear and quadratic effects of source elevation, but no significant effect of geographic distance:

Excluding plants that died over the first winter (2011-2012)

Including all individuals, even first-year overwinter

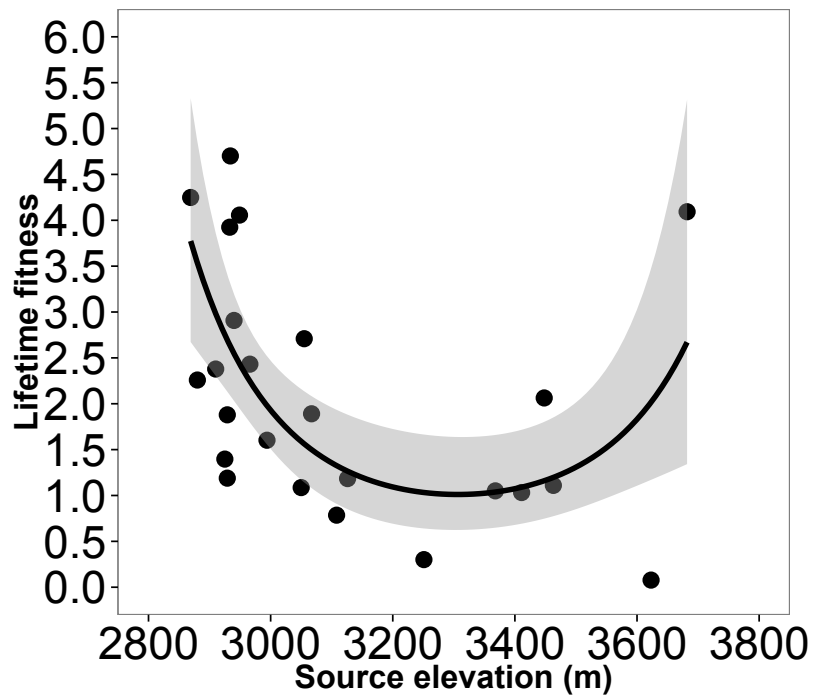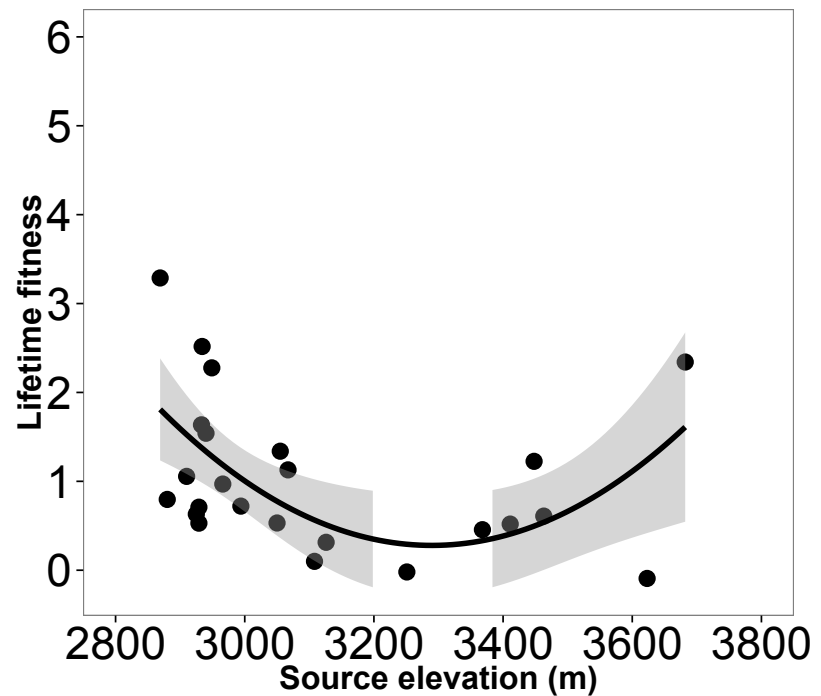

## Online Appendix 6

Fitness analyses including plants that died over the first winter for the Colorado 2011 low elevation cohort. This cohort suffered 49.8% mortality the first winter after planting (winter 2011-2012), leaving 1150 individuals alive on the first census date of 1 June 2012. We excluded those plants from the analyses presented in the main text. Here, we show results of analyses including those plants:

(6A) Initial overwinter survivorship (fall 2011 to June 2012): There was no evidence for clinal variation in fitness during this time frame (Proc Logistic)

|                     | $\chi^2$ | p-value |
|---------------------|----------|---------|
| Elevation of origin | 0.17     | 0.68    |
| Geographic distance | 1.63     | 0.20    |

(6B) Survivorship over the course of the study (from planting to September 2014). We find similar results when we analyze survivorship from planting to the end of the experiment (here) compared with the models presented in the main paper (from initial overwinter survival to September 2014). The odds of survival decline by 8.5% for every 100m increase in source elevation (odds ratio: 0.915; 95% CI: 0.863, 0.970):

|                     | $\chi^2$ | p-value       |
|---------------------|----------|---------------|
| Elevation of origin | 8.8      | <b>0.0030</b> |
| Geographic distance | 0.43     | 0.51          |

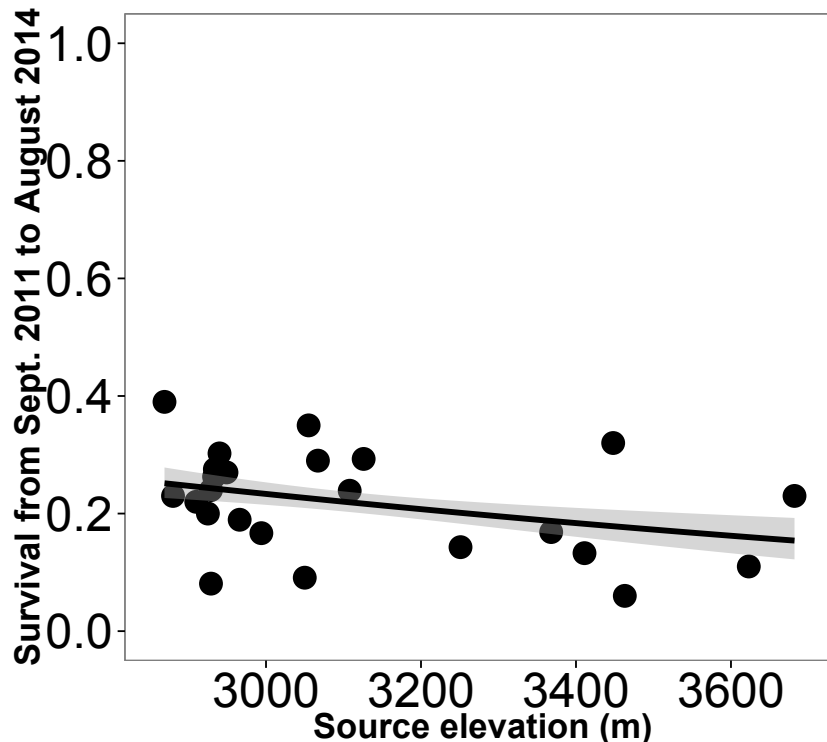

(6C) We analyzed lifetime fitness (numbers of fruits) on all plants, including those that died in the initial winter. The results are similar to those presented in the main text:

|                                    | Beta estimate     | $F_{1,19}$ | p-value       |
|------------------------------------|-------------------|------------|---------------|
| Elevation of origin                | -0.063 ± 0.026    | 6.09       | <b>0.0233</b> |
| Geographic distance                |                   | 1.73       | 0.20          |
| (Elevation of origin) <sup>2</sup> | 9.62E-6 ± 3.90E-6 | 6.10       | <b>0.0232</b> |
| (Geographic distance) <sup>2</sup> |                   | 2.20       | 0.15          |

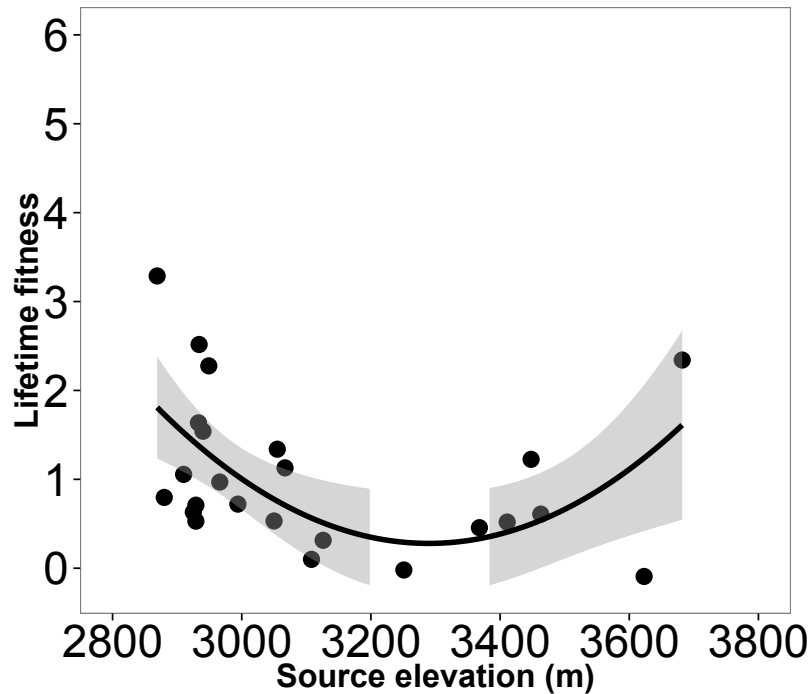

(6D) Finally, we ran a zero-inflated negative binomial model using individual level data, including plants that died in the first winter (R package glmmADMB, ver. 0.8.0). These results are consistent with the dataset confined to the subset of plants that survived the first winter (see Appendix 7).

|                                    | Estimate  | Std. Error        | z value | Pr(> z )        |
|------------------------------------|-----------|-------------------|---------|-----------------|
| Elevation of origin                | -4.86E-02 | 1.18E-02          | -4.13   | <b>3.60E-05</b> |
| Geographic distance                | 4.59E-05  | 5.27E-05          | 0.87    | 0.3839          |
| (Elevation of origin) <sup>2</sup> | 7.41E-06  | 1.79E-06          | 4.15    | <b>3.30E-05</b> |
| Initial plant size                 | 1.16E-02  | 3.66E-03          | 3.16    | <b>0.0016</b>   |
|                                    | $\chi^2$  | p-value           |         |                 |
| genotype                           | 0         | 1.00              |         |                 |
| block                              | 25.42     | <b>&lt;0.0001</b> |         |                 |

Online Appendix 7

Clinal variation in fitness, modeled using individual level lifetime fitness data with a zero-inflated negative binomial distribution (R package glmmADMB ver. 0.8.0) with random effects for genotype and block. Lifetime fecundity was analyzed as a function of linear and quadratic effects of source elevation and geographic distance, and we included initial plant size as a covariate in these multivariate regressions. These individual level data were modeled separately for each garden and cohort. Table 7A shows results of two analyses from the CO 2011 cohort: (1) excluding the plants that died over the initial winter when there was heavy mortality from spring runoff, and (2) including all plants. Individuals that died, did not flower, or simply failed to set fruit were given fitness values of 0. Table 7B has results from the other gardens and cohorts.

Table 7A: 2011 cohort planted into the low elevation Colorado environment. Analyses revealed similar patterns whether the dataset excluded (left) or included (right) plants that died in the initial overwintering period between planting and the first census.

|                                    | Colorado 2011 cohort: Low elevation. Excluding plants that died during the first winter |                   |         |                 | Colorado 2011 cohort: Low elevation. Including all plants |                   |         |                 |
|------------------------------------|-----------------------------------------------------------------------------------------|-------------------|---------|-----------------|-----------------------------------------------------------|-------------------|---------|-----------------|
|                                    | Estimate                                                                                | SE                | z value | Pr(> z )        | Estimate                                                  | SE                | z value | Pr(> z )        |
| Source elevation                   | -4.67E-02                                                                               | 1.16E-02          | -4.01   | <b>6.00E-05</b> | -4.80E-02                                                 | 1.18E-02          | -4.07   | <b>4.70E-05</b> |
| Geographic distance                | 1.32E-04                                                                                | 9.60E-05          | 1.37    | 0.17            | 1.11E-04                                                  | 9.63E-05          | 1.16    | 0.26            |
| (Source elevation) <sup>2</sup>    | 7.11E-06                                                                                | 1.76E-06          | 4.03    | <b>5.50E-05</b> | 7.32E-06                                                  | 1.79E-06          | 4.09    | <b>4.40E-05</b> |
| (Geographic distance) <sup>2</sup> | -1.38E-08                                                                               | 1.21E-08          | -1.14   | 0.25            | -9.95E-09                                                 | 1.22E-08          | -0.82   | 0.41            |
| Initial plant size                 | 9.12E-03                                                                                | 3.47E-03          | 2.63    | <b>0.0086</b>   | 1.10E-02                                                  | 3.71E-03          | 2.95    | <b>0.0031</b>   |
|                                    | $\chi^2$                                                                                | p-value           |         |                 | $\chi^2$                                                  | p-value           |         |                 |
| genotype                           | 0                                                                                       | 1                 |         |                 | 0                                                         | 1                 |         |                 |
| block                              | 29.06                                                                                   | <b>&lt;0.0001</b> |         |                 | 26                                                        | <b>&lt;0.0001</b> |         |                 |

Table 7B: Results of zero-inflated negative binomial models for the remaining sites are consistent with family level models (see main text).

|                                    | Colorado 2012 cohort: Low elevation |          |         |          | Colorado 2012 cohort: High elevation |          |                   |              | Idaho 2011 cohort |          |                   |                   | Idaho 2012 cohort |          |         |              |
|------------------------------------|-------------------------------------|----------|---------|----------|--------------------------------------|----------|-------------------|--------------|-------------------|----------|-------------------|-------------------|-------------------|----------|---------|--------------|
|                                    | Estimate                            | SE       | z value | Pr(> z ) | Estimate                             | SE       | z value           | Pr(> z )     | Estimate          | SE       | z value           | Pr(> z )          | Estimate          | SE       | z value | Pr(> z )     |
| Source elevation                   | -3.7E-03                            | 1.11E-02 | -0.33   | 0.74     | -1.7E-02                             | 1.98E-02 | -0.88             | 0.38         | 3.3E-02           | 1.70E-02 | 1.94              | 0.053             | 9.3E-03           | 1.05E-01 | 0.09    | 0.93         |
| Geographic distance                | 9.6E-07                             | 1.07E-04 | 0.01    | 0.99     | 4.6E-04                              | 2.69E-04 | 1.71              | 0.087        | -6.2E-04          | 3.70E-04 | -1.67             | 0.094             | 3.8E-04           | 2.61E-03 | 0.15    | 0.88         |
| (Source elevation) <sup>2</sup>    | 5.1E-07                             | 1.69E-06 | 0.3     | 0.76     | 2.7E-06                              | 3.04E-06 | 0.89              | 0.37         | -6.3E-06          | 3.32E-06 | -1.89             | 0.058             | -6.2E-07          | 2.09E-05 | -0.03   | 0.98         |
| (Geographic distance) <sup>2</sup> | 4.1E-10                             | 1.12E-08 | 0.04    | 0.97     | -3.2E-08                             | 1.74E-08 | -1.85             | 0.064        | 1.7E-07           | 1.25E-07 | 1.33              | 0.18              | -3.6E-07          | 1.00E-06 | -0.36   | 0.72         |
| Initial plant size                 | 2.1E-03                             | 4.46E-03 | 0.46    | 0.64     | 4.2E-03                              | 2.11E-03 | 1.98              | <b>0.048</b> | 1.6E-02           | 1.17E-03 | 13.9              | <b>&lt;0.0001</b> | 7.2E-02           | 3.35E-02 | 2.14    | <b>0.032</b> |
|                                    | $\chi^2$                            | p-value  |         |          | $\chi^2$                             | p-value  |                   |              | $\chi^2$          | p-value  |                   |                   | $\chi^2$          | p-value  |         |              |
| genotype                           | 2.08                                | 0.15     |         |          | genotype                             | 92.88    | <b>&lt;0.0001</b> |              | genotype          | 49.34    | <b>&lt;0.0001</b> |                   | genotype          | 0        | 1       |              |
| block                              | 0.7                                 | 0.4      |         |          | block                                | 1.48     | 0.22              |              | block             | 11.66    | <b>0.0006</b>     |                   | block             | 0        | 1       |              |
